# Supplementary material
Source: publisher figshare collection journal article supplement (https://sage.figshare.com/ndownloader/files/20161817)
Supplement: Supplementary file 1 [file 20161817]

**Table 1 Supplement. Descriptive Statistics (2006-2016)**

| Variables                                           | Mean   | SD     | Min     | Max    | Description                                                                                    | Data Source |
|-----------------------------------------------------|--------|--------|---------|--------|------------------------------------------------------------------------------------------------|-------------|
| <b><i>Dependent Variables</i></b>                   |        |        |         |        |                                                                                                |             |
| Math                                                | 0.077  | 0.834  | -6.493  | 3.034  | Standardized elementary/middle school math proficiency index (PI)                              | NYSED       |
| ELA                                                 | 0.079  | 0.860  | -3.957  | 3.461  | Standardized elementary/middle school ELA proficiency index (PI)                               | NYSED       |
| <b><i>Independent Variables</i></b>                 |        |        |         |        |                                                                                                |             |
| Per-pupil year-end fund balance (log)               | 8.297  | 0.721  | 4.083   | 11.406 | Year-end fund balance/pupil                                                                    | OSC         |
| Per-pupil operating position (in thousands)         | 0.355  | 1.148  | -22.679 | 19.857 | (Revenues-expenditures)/pupil                                                                  | OSC         |
| Cash ratio                                          | 2.906  | 2.293  | 0       | 20.190 | (Cash + cash equivalents + short-term investments) /current liabilities                        | OSC         |
| Per-pupil debt burden (log)                         | 9.270  | 0.780  | 1.664   | 11.212 | (Total debt outstanding at the end of fiscal year)/pupil                                       | OSC         |
| <b><i>Control Variables</i></b>                     |        |        |         |        |                                                                                                |             |
| Population (log)                                    | 9.237  | 1.003  | 5.464   | 12.563 | School district population                                                                     | SAIPE       |
| % Free-lunch eligibility                            | 25.155 | 16.298 | 0       | 95     | Percentage of enrolled students eligible for free lunch                                        | NYSED       |
| % English learners                                  | 2.170  | 4.961  | 0       | 92     | Percentage of English language learners                                                        | NYSED       |
| % Black                                             | 5.415  | 10.168 | 0       | 81     | Percentage of Black students                                                                   | NYSED       |
| % Hispanic                                          | 7.346  | 11.351 | 0       | 82     | Percentage of Hispanic students                                                                | NYSED       |
| Per-capita personal income (in thousands)           | 47.822 | 15.730 | 27.789  | 94.384 | Personal income per capita                                                                     | BEA         |
| Unemployment rate (%)                               | 6.401  | 1.736  | 3.4     | 11     | Unemployment rate                                                                              | BLS         |
| <b><i>Response Variables</i></b>                    |        |        |         |        |                                                                                                |             |
| Per-pupil general operating spending (in thousands) | 2.792  | 2.519  | 0.532   | 70.635 | General operating spending/pupil                                                               | OSC         |
| Per-pupil instructional spending (in thousands)     | 10.710 | 3.341  | 5.574   | 47.439 | Instructional spending/pupil                                                                   | OSC         |
| Per-pupil debt service spending (in thousands)      | 1.678  | 1.196  | 0       | 50.527 | (Repayment of debt and interest payment on debt)/pupil                                         | OSC         |
| Per-pupil other spending (in thousands)             | 9.179  | 3.913  | 2.272   | 69.132 | (All other spending besides general operating, instructional, and debt service spending)/pupil | OSC         |

*Note:*

1. BEA – U.S. Bureau of Economic Analysis; BLS – U.S. Bureau of Labor Statistics; NYSED – New York State Education Department; OSC – Office of the New York State Comptroller; SAIPE – U.S. Census Bureau’s Small Area Income and Poverty Estimates program.
2. Per-pupil year-end fund balances, per-pupil operating positions, per-pupil debt burdens, per-pupil general operating spending, per-pupil instructional spending, per-pupil debt service spending, per-pupil other spending, and per-capita personal income are inflation-adjusted using the GDP price index (2016 dollars). This table is prepared using the sample for math performance indices, which includes larger observations than ELA performance index.
3. The numbers of observations for Math, ELA, the per-pupil year-end fund balance (log), and the per-pupil debt burden (log) are 7,385, 7,373, 7,359, and 7,265, respectively, while all other variables include 7,399 as the number of observations.
4. Although the cash ratio can be defined more narrowly by excluding short-term investments, this study defines it more broadly, following the approach of Wang et al. (2007), Stone et al. (2015), and the New York State fiscal stress monitoring system.
